# Supplementary material for: Health Savings Accounts: Consumer Contribution Strategies and Policy Implications
Source: PubMed Central journal article supplement — MDM Policy Pract. 2018 Dec 20;3(2):2381468318809373. doi: 10.1177/2381468318809373 (PMC8855402; doi:10.1177/2381468318809373), 2018-12-20
Supplement: DS_10.1177_2381468318809373.pdf [file DS_10.1177_2381468318809373.pdf]

# Supplementary material for Health Savings Accounts: Consumer Contribution Strategies & Policy Implications

David J. Lowsky

Independent Researcher, Santa Monica, CA 90403, dlowsky@gmail.com

Donald K.K. Lee

Yale University, New Haven, CT 06520, donald.lee@yale.edu

Stefanos A. Zenios

Stanford University, Stanford, CA 94305, stefzen@stanford.edu

This supplement provides a proof for the dynamic policy contribution (4) stated in the main body of the paper.

---

The proposed contribution is adapted from the solution to the following problem: Consider the infinite horizon version of problem (3), i.e.  $T = \infty$ . A closed form solution exists under the following idealized conditions:

A1 Funds can be withdrawn from the HSA for non-qualified expenses, penalty-free.

A2 There is a one-to-one correspondence between cost percentiles  $X_t$  and OOP expenses  $V_t$ .

A3 The distribution of household costs is stationary in time (no annual inflation).

PROPOSITION 1. *Suppose  $T = \infty$  and that A1-A3 hold. Then the solution to (3) is*

$$C_t = v_t - (1 + w)W_{t-1},$$

where  $v_t$  is the unique cost threshold satisfying

$$\mathbb{P}(V_t \leq v_t | X_{t-1}) = Q = \frac{h - 1}{h - \delta(1 + w)}.$$

To adapt the solution above to the more realistic setting where A1-A3 do not hold and  $T < \infty$ , we make the following changes to arrive at (4). First, because there is significant penalty for

withdrawing funds from the HSA for non-qualified expenses, we prohibit  $C_t$  from becoming negative by setting it to  $\max\{0, v_t - (1+w)W_{t-1}\}$  in (4). Second, because the OOP expenses  $V_t$  is capped by the OOP maximum  $M_t$ , the distribution of  $V_t$  may have an atomic mass at  $M_t$  that invalidates A2. Hence if  $\mathbb{P}(V_t < M_t | X_{t-1}) < Q$ , the modified threshold  $v_t$  defined in (5) becomes  $M_t$ . Third, to capture cost inflation, our cost evolution model explicitly accounts for it. Finally, the performance of the policy is evaluated over a finite contribution period using a simulation.

*Proof of Proposition 1.* Consider a household in cost percentile  $X_{t-1}$  in the previous year and with HSA balance  $W$ . It transitions to cost percentile  $X_t$  in the following year and incurs  $V(X_t)$  in OOP expenses. For notational brevity we use  $X, Z$  to denote  $X_{t-1}, X_t$ , and  $p(Z|X)$  is the probability of transition from  $X$  to  $Z$ . Then Bellman's optimality equation is

$$\begin{aligned} B(W, X) &= \delta \min_c \left\{ c + \int_{V(Z) < (1+w)W+c} p(Z|X) B((1+w)W + c - V(Z), Z) dZ \right. \\ &\quad \left. + \int_{V(Z) \geq (1+w)W+c} p(Z|X) [B(0, Z) + h(V(Z) - (1+w)W - c)] dZ \right\} \\ &= -\delta(1+w)W + \delta \min_v \left\{ v + \int_0^{z(v)} p(Z|X) B(v - V(Z), Z) dZ \right. \\ &\quad \left. + \int_{z(v)}^1 p(Z|X) [B(0, Z) + h(V(Z) - v)] dZ \right\} \end{aligned}$$

where  $v = (1+w)W + c$ , and  $z(v)$  is the percentile for the OOP expense  $v$ :  $V(z(v)) = v$ . This shows that the solution is of the form  $B(W, X) = \bar{B}(X) - \delta(1+w)W$ . Substituting back into the above yields a Bellman equation for  $\bar{B}(X)$ :

$$\begin{aligned} \bar{B}(X) &= \delta \min_v \left\{ v + \int_0^{z(v)} p(Z|X) (\bar{B}(Z) - \delta(1+w)(v - V(Z))) dZ + \int_{z(v)}^1 p(Z|X) [\bar{B}(Z) + h(V(Z) - v)] dZ \right\} \\ &= \delta E[\bar{B}(Z)|X] + \delta \min_v \left\{ v - \delta(1+w) \int_0^{z(v)} p(Z|X)(v - V(Z)) dZ + h \int_{z(v)}^1 p(Z|X)(V(Z) - v) dZ \right\}. \end{aligned}$$

Since  $E[\bar{B}(Z)|X]$  is a constant, the optimal value for  $v$  satisfies the first order condition

$$p(V(Z) \leq v|X) = p(Z \leq z(v)|X) = \frac{h-1}{h-\delta(1+w)},$$

and hence

$$c = v - (1+w)W.$$

In addition, from the second order condition we obtain the necessary condition  $h > \delta(1+w)$ .  $\square$
